1 **A bacterial symbiont protects honey bees from fungal disease**

2 Delaney L. Miller<sup>1</sup>, Eric A. Smith<sup>1</sup>, Irene L. G. Newton<sup>1\*</sup>

3 <sup>1</sup>Department of Biology, Indiana University, Bloomington, Indiana, USA

4 \*Author for Correspondence: Irene L. G. Newton, Department of Biology, Indiana University,

5 Bloomington, Indiana, USA, (812) 855-3883, [irnewton@indiana.edu](mailto:irnewton@indiana.edu)

6

7

8

9

10

11

12

13

14

15

16

17

18

19

20

21

22

23

24

25           **Fungi are the leading cause of insect disease, contributing to the decline of wild and**  
26 **managed populations<sup>1,2</sup>. For ecologically and economically critical species, such as the**  
27 **European honey bee (*Apis mellifera*), the presence and prevalence of fungal pathogens can**  
28 **have far reaching consequences, endangering other species and threatening food**  
29 **security<sup>3,4,5</sup>. Our ability to address fungal epidemics and opportunistic infections is**  
30 **currently hampered by the limited number of antifungal therapies<sup>6,7</sup>. Novel antifungal**  
31 **treatments are frequently of bacterial origin and produced by defensive symbionts**  
32 **(bacteria that associate with an animal/plant host and protect against natural enemies<sup>8,9</sup>.**  
33 **Here we examined the capacity of a honey bee-associated bacterium, *Bombella apis*, to**  
34 **suppress the growth of fungal pathogens and ultimately protect bee brood (larvae and**  
35 **pupae) from infection. Our results showed that strains of *B. apis* inhibit the growth of two**  
36 **insect fungal pathogens, *Beauveria bassiana* and *Aspergillus flavus*, *in vitro*. This phenotype**  
37 **was recapitulated *in vivo*; bee brood supplemented with *B. apis* were significantly less likely**  
38 **to be infected by *A. flavus*. Additionally, the presence of *B. apis* reduced sporulation of *A.***  
39 ***flavus* in the few bees that were infected. Analyses of biosynthetic gene clusters across *B.***  
40 ***apis* strains suggest antifungal production via a Type I polyketide synthase. Secreted**  
41 **metabolites from *B. apis* alone were sufficient to suppress fungal growth, supporting this**  
42 **hypothesis. Together, these data suggest that *B. apis* protects bee brood from fungal**  
43 **infection by the secretion of an antifungal metabolite. On the basis of this discovery, new**  
44 **antifungal treatments could be developed to mitigate honey bee colony losses, and, in the**  
45 **future, could address fungal epidemics in other species.**

46 Emerging fungal pathogens pose major threats to animal and plant populations<sup>2</sup>. Among  
47 insects, fungal pathogens are currently the most common causal agents of disease, and  
48 historically have plagued insect hosts for over 300 million years<sup>1,10</sup>. In recent years, fungal  
49 pathogens have contributed to the unprecedented population decline of honey bees, causing  
50 opportunistic infections in already stressed colonies<sup>3,4</sup>. Within the colony, the most susceptible  
51 individuals are arguably the bee brood (larvae and pupae), which are exposed to fungal  
52 pathogens, notably chalkbrood (*Ascophaera apis*) and stonebrood (*Aspergillus flavus*)<sup>11,12</sup>.  
53 Although the spread of fungal disease among the brood can be limited by the hygienic behavior  
54 of honey bee nurses<sup>13</sup>, this behavior does not prevent infection. However, brood fungal infections  
55 in other insects are sometimes inhibited by the presence of bacterial symbionts<sup>14,15,8</sup>. Given that  
56 honey bee brood are reared in the presence of a handful of bacterial taxa<sup>16,17</sup>, it is possible these  
57 microbes play similar defensive roles. Indeed, worker honey bee pathogen susceptibility  
58 correlates with changes in their microbiome composition and abundance<sup>18,19,20,21</sup>. Furthermore,  
59 the presence of key microbiome members in worker bees can alter the prevalence of bacterial  
60 diseases<sup>22,23,24,25</sup>. In aggregate, this evidence suggests that honey bee-associated bacteria can  
61 defend against bacterial pathogens and may similarly protect the host from fungal disease.

62 One of the most prevalent brood-associated bacteria is *Bombella apis* (formerly  
63 *Parasaccharibacter apium*), an acetic-acid bacterium found in association with nectar and royal  
64 jelly. Within the colony it is distributed across niches including larvae, the queen's gut, worker  
65 hypopharyngeal glands, and nectar stores. Many of the niches it colonizes, particularly the  
66 larvae, are susceptible to fungal infection and/or contamination, and its localization to these  
67 niches may be indicative of a protective role. Furthermore, increased *B. apis* load is negatively  
68 correlated with *Nosema* (a fungal pathogen) in honey bee adults, suggesting interactive effects.

69 However, since *B. apis* is rarely found in adult guts, this interaction may be the result of *B. apis*-  
70 fungal interactions in the diet and where brood are reared. Additionally, the mechanism by which  
71 *B. apis* might interact with and/or suppress fungal pathogens is unknown.

72 Here we examined the potential of *B. apis* to prevent fungal infection in brood and the  
73 bacterial genes underlying pathogen defense. To determine the impact of *B. apis* on fungal  
74 colonization, we used two different insect pathogens in our assays: *Beauveria bassiana*, a  
75 generalist pathogen that infects 70% of insect species, and *A. flavus*, an opportunistic pathogen  
76 of honey bee brood. To determine the ability of *B. apis* to inhibit fungal growth *in vitro*, we  
77 competed each fungal pathogen with one of five *B. apis* strains, isolated from apiaries in the US  
78 (Fig 1a). In the presence of *B. apis* strains, fungal growth was either suppressed or completely  
79 inhibited, (Fig 1b). To quantify fungal inhibition, we counted spores of *B. bassiana* or *A. flavus*  
80 co-cultured with *B. apis*. The number of spores produced by both *B. bassiana* and *A. flavus*, was  
81 reduced by an order of magnitude on average (Fig 1c), showing that *B. apis* can suppress growth  
82 of both pathogens.

83 To test if *B. apis* is capable of preventing fungal infections *in vivo*, we collected larvae  
84 from our apiary and reared them on a diet supplemented with either *B. apis* or a sterile media  
85 control. Once reared to pupae, the cohort was inoculated with *A. flavus* or a sterile media control  
86 and presence of infection was scored until adulthood (Fig 2a). Pupae that were supplemented  
87 with *B. apis* as larvae were significantly more likely to resist fungal infection ( $\chi^2 = 14.8$ ,  $df = 1$ ,  
88  $p < 0.001$ ), with 66% of the cohort surviving to adulthood with no signs of infection (Fig 2b,c).  
89 In sharp contrast, without *B. apis*, no pupae survived to adulthood (Fig 2b, d). Interestingly, in  
90 the 34% of *B. apis*-supplemented pupae that succumbed to fungal infection, the number of spores  
91 produced was 68% on average (Fig 2e;  $t = 2.9116$ ,  $df = 8.4595$ ,  $p = 0.02$ ). Taken together, these

92 results suggest that the presence of *B. apis* increases the host's likelihood of survival under  
93 fungal challenge, while decreasing the pathogen's spore load and potential to spread infection to  
94 new hosts.

95 To determine if *B. apis* produces antifungal metabolite(s), we incubated fungi in spent  
96 media (SM) from *B. apis*, filtered to exclude bacterial cells and normalized for final optical  
97 density reached (Fig 3a). Growth of both *B. bassiana* and *A. flavus* were significantly reduced by  
98 spent media alone, indicating that *B. apis*-induced changes in the media are sufficient to suppress  
99 fungal growth. To eliminate the possibility that fungal inhibition was mediated by acidification  
100 of the media, *A. flavus* was cultured in media acidified to pH of 5.0 (the same pH of *B. apis* SM).  
101 pH had no significant effect on fungal growth (Fig S3;  $t = -0.251$ ,  $df = 35$ ,  $p = 0.804$ ). Therefore,  
102 it is likely that *B. apis* inhibits fungi via secretion of an antifungal secondary metabolite(s). We  
103 used antiSMASH<sup>26</sup> to annotate secondary metabolite gene clusters in the genomes of all *B. apis*  
104 strains used in this study and found that all strains have a conserved type 1 polyketide synthase  
105 (T1PKS) region. Type 1 polyketide synthases are common among host-associated microbes and  
106 produce macrolides which often have antifungal activity<sup>8,27,28,29</sup>. Additionally, all *B. apis* strains  
107 contain an aryl polyene synthesis cluster. The commonly used antifungals amphotericin, nystatin  
108 and pimarinin are all polyenes, suggesting that this gene cluster may also contribute to the  
109 production of antifungal compound(s). Further functional characterization of these gene clusters  
110 will help elucidate whether they play a role in the antifungal phenotype of *B. apis*. Considering  
111 the antifungal activity of *B. apis* secreted metabolites *in vitro* and our genomic predictions, it is  
112 likely that *B. apis* synthesizes and secretes a metabolite capable of inhibiting fungi.

113 Our results provide evidence that a honey bee-associated bacterium, *B. apis*, is capable of  
114 suppressing two prevalent insect fungal pathogens both *in vitro* and *in vivo*, likely via the

115 synthesis of an antifungal metabolite. Our *in vitro* results demonstrate antifungal activity in all  
116 sampled strains of *B. apis*, with some variation between strains. Analysis of biosynthetic gene  
117 clusters present across all strains of *B. apis* revealed two putative regions involved in antifungal  
118 production: an aryl polyene synthetase and a T1PKS. Given that a significant proportion of  
119 known bacterially-produced antifungals are polyketides<sup>8,27,28,29</sup>, the T1PKS is a promising  
120 candidate region.

121         On the basis of our *in vivo* experiments, supplementing honey bee colonies with *B. apis*  
122 may decrease colony losses due to fungal disease. Indeed, in the field, supplementation of *B.*  
123 *apis* is correlated with a reduction in *Nosema* load in adult bees<sup>22</sup>. Beyond decreasing colony  
124 losses and fungal load via direct inhibition of fungal infection, the presence of *B. apis* may limit  
125 disease transmission by reducing the number of spores produced per infection. In addition, it  
126 may suppress adult-specific pathogens, which could be transiently harbored in the larval diet  
127 between adult hosts<sup>30</sup>.

128         Altering the prevalence of pathogenic fungi within managed honey bee colonies could  
129 have further ecological consequences. Floral resources shared among diverse pollinators act as  
130 transmission centers for fungi, both pathogenic and saprophytic<sup>31</sup>. Species-specific fungal  
131 pathogens can be seeded in pollen and nectar sources<sup>32</sup>, after which diverse pollinators, including  
132 native bees, can act as vectors to transmit the fungal pathogens to other floral sources, thereby  
133 facilitating heterospecific transmission of fungal agents<sup>33</sup>. As a result of reduced spore loads  
134 within colonies, the load of fungal pathogens deposited in local floral resources by foragers  
135 might also decrease, and perhaps reduce heterospecific transmission and spillover events<sup>34</sup>.

136 Methods Summary

137 Competition assays were carried out with stationary cultures of *B. apis* normalized to the same  
138 OD and  $10^3$  spores of either fungal isolate in liquid or solid MRS media. The number of spores  
139 produced was counted on a hemocytometer under a light microscope at 40x magnification.  
140 Larvae were maintained on UV-sterilized larval diet and supplemented with stationary cultures  
141 of *B. apis*. A total of  $10^3$  spores of *A. flavus* were added to half the brood, five days into the  
142 pupal phase. Presence of fungal infection was scored daily until adulthood. Spent media (SM) of  
143 *B. apis* was obtained by spinning down stationary cultures and filtering out remaining bacterial  
144 cells using a 0.25  $\mu$ m filter.  $10^3$  spores of either fungal isolate were incubated in equal volumes  
145 SM and fresh media; OD600 was used as proxy for fungal growth. Genomes for all strains were  
146 downloaded from GenBank (see Table 1 for accession numbers) and re-annotated with  
147 RAST<sup>35,36</sup>. The resulting GFF files and corresponding genome files were uploaded to  
148 antiSMASH<sup>26</sup> and results were compared across strains to determine conserved secondary  
149 metabolite synthesis clusters.

150

- 151 1. St. Leger, R. J. & Wang, C. Genetic engineering of fungal biocontrol agents to achieve  
152 greater efficacy against insect pests. *Applied Microbiology and Biotechnology* **85**, 901–  
153 907 (2010).
- 154 2. Fisher, M. C. *et al.* Emerging fungal threats to animal, plant and ecosystem health. (2012).  
155 doi:10.1038/nature10947
- 156 3. Brodschneider, R. *et al.* Multi-country loss rates of honey bee colonies during winter  
157 2016/2017 from the COLOSS survey. *J. Apic. Res.* (2018).  
158 doi:10.1080/00218839.2018.1460911

- 159 4. Paxton, R. J. Does infection by *Nosema ceranae* cause ‘Colony Collapse Disorder’ in  
160 honey bees (*Apis mellifera*)? *J. Apic. Res.* **49**, 80–84 (2010).
- 161 5. Fürst, M. A., McMahon, D. P., Osborne, J. L., Paxton, R. J. & Brown, M. J. F. Disease  
162 associations between honeybees and bumblebees as a threat to wild pollinators. *Nature*  
163 **506**, 364–366 (2014).
- 164 6. Roemer, T. & Krysan, D. J. Antifungal drug development: challenges, unmet clinical  
165 needs, and new approaches. *Cold Spring Harbor perspectives in medicine* **4**, (2014).
- 166 7. Williams, G. R., Shutler, D., Little, C. M., Burgher-Maclellan, K. L. & Rogers, R. E. L.  
167 The microsporidian *Nosema ceranae*, the antibiotic Fumagilin-B®, and western honey bee  
168 (*Apis mellifera*) colony strength. *Apidologie* **42**, 15–22 (2011).
- 169 8. Arnam, E. B. Van, Currie, C. R. & Clardy, J. Chem Soc Rev Chemical Society Reviews  
170 [rsc.li/chem-soc-rev](http://rsc.li/chem-soc-rev) Includes themed articles on chemical signaling at the  
171 eukaryotic/prokaryotic interface Defense contracts: molecular protection in insect-microbe  
172 symbioses. *Chem. Soc. Rev* **47**, 1638
- 173 9. Kaltenpoth, M. Actinobacteria as mutualists: general healthcare for insects?  
174 [doi:10.1016/j.tim.2009.09.006](https://doi.org/10.1016/j.tim.2009.09.006)
- 175 10. Sung, G. H., Poinar, G. O. & Spatafora, J. W. The oldest fossil evidence of animal  
176 parasitism by fungi supports a Cretaceous diversification of fungal-arthropod symbioses.  
177 *Mol. Phylogenet. Evol.* **49**, 495–502 (2008).
- 178 11. Foley, K., Fazio, G., Jensen, A. B. & Hughes, W. O. H. The distribution of *Aspergillus*  
179 spp. opportunistic parasites in hives and their pathogenicity to honey bees. *Vet. Microbiol.*



- 180           **169**, 203–210 (2014).
- 181    12.    Aronstein, K. A. & Murray, K. D. Chalkbrood disease in honey bees. *J. Invertebr. Pathol.*  
182           **103**, (2010).
- 183    13.    Swanson, J. A. I. *et al.* Odorants that induce hygienic behavior in honeybees:  
184           Identification of volatile compounds in chalkbrood-infected honeybee larvae. *J. Chem.*  
185           *Ecol.* **35**, 1108–1116 (2009).
- 186    14.    Kaltenpoth, M., Göttler, W., Herzner, G. & Strohm, E. Symbiotic bacteria protect wasp  
187           larvae from fungal infestation. *Curr. Biol.* **15**, 475–479 (2005).
- 188    15.    Flórez, L. V. *et al.* An antifungal polyketide associated with horizontally acquired genes  
189           supports symbiont-mediated defense in *Lagria villosa* beetles. *Nat. Commun.* **9**, 2478  
190           (2018).
- 191    16.    Rokop, Z. P., Horton, M. A. & Newton, I. L. G. Interactions between Cooccurring Lactic  
192           Acid Bacteria in Honey Bee Hives. *Appl. Environ. Microbiol.* **81**, 7261–70 (2015).
- 193    17.    Vojvodic, S., Rehan, S. M. & Anderson, K. E. Microbial Gut Diversity of Africanized and  
194           European Honey Bee Larval Instars. *PLoS One* **8**, 72106 (2013).
- 195    18.    Erban, T. *et al.* Bacterial community associated with worker honeybees ( *Apis mellifera* )  
196           affected by European foulbrood . *PeerJ* (2017). doi:10.7717/peerj.3816
- 197    19.    Erban, T. *et al.* Honeybee (*Apis mellifera*)-associated bacterial community affected by  
198           American foulbrood: Detection of *Paenibacillus* larvae via microbiome analysis  
199           /631/158/855 /631/326/2565/855 /38/23 /38/22 /38/47 article. *Sci. Rep.* (2017).  
200           doi:10.1038/s41598-017-05076-8

- 201 20. Maes, P. W., Rodrigues, P. A. P., Oliver, R., Mott, B. M. & Anderson, K. E. Diet-related  
202 gut bacterial dysbiosis correlates with impaired development, increased mortality and  
203 Nosema disease in the honeybee (*Apis mellifera*). *Mol. Ecol.* (2016).  
204 doi:10.1111/mec.13862
- 205 21. Raymann, K., Shaffer, Z. & Moran, N. A. Antibiotic exposure perturbs the gut microbiota  
206 and elevates mortality in honeybees. *PLoS Biol.* (2017). doi:10.1371/journal.pbio.2001861
- 207 22. Corby-Harris, V. *et al.* Parasaccharibacter apium, gen. Nov., sp. Nov., Improves Honey  
208 Bee (Hymenoptera: Apidae) resistance to Nosema. *J. Econ. Entomol.* (2016).  
209 doi:10.1093/jee/tow012
- 210 23. Schwarz, R. S., Moran, N. A. & Evans, J. D. Early gut colonizers shape parasite  
211 susceptibility and microbiota composition in honey bee workers. *Proc. Natl. Acad. Sci.*  
212 (2016). doi:10.1073/pnas.1606631113
- 213 24. Forsgren, E., Olofsson, T. C., Vásquez, A. & Fries, I. Novel lactic acid bacteria inhibiting  
214 *Paenibacillus* larvae in honey bee larvae. *Apidologie* (2010). doi:10.1051/apido/2009065
- 215 25. Kwong, W. K., Mancenido, A. L. & Moran, N. A. Immune system stimulation by the  
216 native gut microbiota of honey bees. *R. Soc. Open Sci.* (2017). doi:10.1098/rsos.170003
- 217 26. Blin, K. *et al.* antiSMASH 5.0: updates to the secondary metabolite genome mining  
218 pipeline. *Nucleic Acids Res.* **47**, W81–W87 (2019).
- 219 27. Van Arnem, E. B. *et al.* Selvamycin, an atypical antifungal polyene from two alternative  
220 genomic contexts. *Proc. Natl. Acad. Sci. U. S. A.* **113**, 12940–12945 (2016).
- 221 28. Kroiss, J. *et al.* Symbiotic streptomycetes provide antibiotic combination prophylaxis for

- 222 wasp offspring. *Nat. Chem. Biol.* **6**, 261–263 (2010).
- 223 29. Chevrette, M. G. *et al.* The antimicrobial potential of *Streptomyces* from insect  
224 microbiomes. *Nat. Commun.* **10**, 516 (2019).
- 225 30. Folly, A. J., Koch, H., Stevenson, P. C. & Brown, M. J. F. Larvae act as a transient  
226 transmission hub for the prevalent bumblebee parasite *Crithidia bombi*. *J. Invertebr.*  
227 *Pathol.* **148**, 81–85 (2017).
- 228 31. Graystock, P., Goulson, D. & Hughes, W. O. H. Parasites in bloom: Flowers aid dispersal  
229 and transmission of pollinator parasites within and between bee species. *Proc. R. Soc. B*  
230 *Biol. Sci.* **282**, (2015).
- 231 32. Graystock, P. *et al.* The Trojan hives: Pollinator pathogens, imported and distributed in  
232 bumblebee colonies. *J. Appl. Ecol.* (2013). doi:10.1111/1365-2664.12134
- 233 33. Hedtke, S. M., Blitzer, E. J., Montgomery, G. A. & Danforth, B. N. Introduction of non-  
234 native pollinators can lead to trans-continental movement of bee- Associated fungi. *PLoS*  
235 *One* **10**, (2015).
- 236 34. Plischuk, S. *et al.* South American native bumblebees (Hymenoptera: Apidae) infected by  
237 *Nosema ceranae* (Microsporidia), an emerging pathogen of honeybees (*Apis mellifera*).  
238 *Environ. Microbiol. Rep.* **1**, 131–135 (2009).
- 239 35. Aziz, R. K. *et al.* The RAST Server: Rapid annotations using subsystems technology.  
240 *BMC Genomics* **9**, (2008).
- 241 36. Overbeek, R. *et al.* The SEED and the Rapid Annotation of microbial genomes using  
242 Subsystems Technology (RAST). *Nucleic Acids Res.* **42**, D206–D214 (2014)

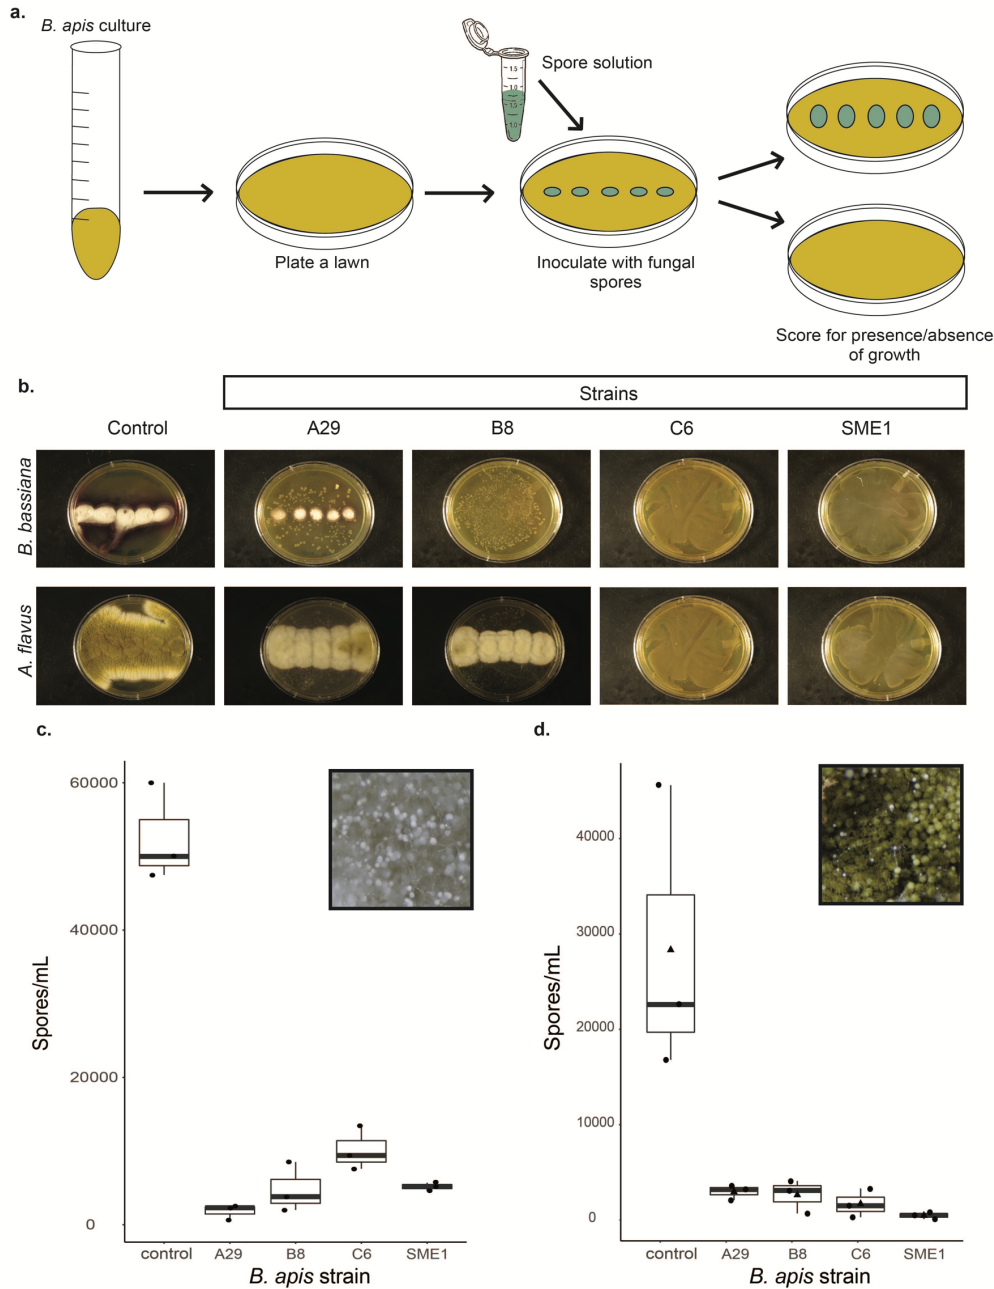

243

244 **Figure 1: *B. apis* outcompetes fungal pathogens *in vitro*.** **a**, The ability of each fungal isolate  
245 to grow on a *B. apis* lawns was qualitatively assayed. **b**, Compared to fungal controls, the  
246 presence of *B. apis* either suppressed or completely inhibited fungal growth, depending on strain  
247 identity. **c**, When co-cultured in liquid media, the presence of *B. apis* strongly reduced the  
248 number of spores produced by *B. bassiana* (A29:  $t = 13.114$ ,  $df = 2$ ,  $p = 0.19$ ; B8:  $t = 11.147$ ,  $df = 3$ ,  $p = 0.006$ ;  
249 C6:  $t = 10.121$ ,  $df = 2.7$ ,  $p = 0.011$ ; SME1:  $t = 12.352$ ,  $df = 2$ ,  $p = 0.025$ ) and *A.*  
250 *flavus* (A29:  $t = 2.8807$ ,  $df = 2$ ,  $p = 0.40$ ; B8:  $t = 2.9033$ ,  $df = 2$ ,  $p = 0.39$ ; C6:  $t = 3.0137$ ,  $df = 2$ ,  
251  $p = 0.37$ ; SME1:  $t = 3.1679$ ,  $df = 2$ ,  $p = 0.34$ ), depending on *B. apis* strain identity.

252

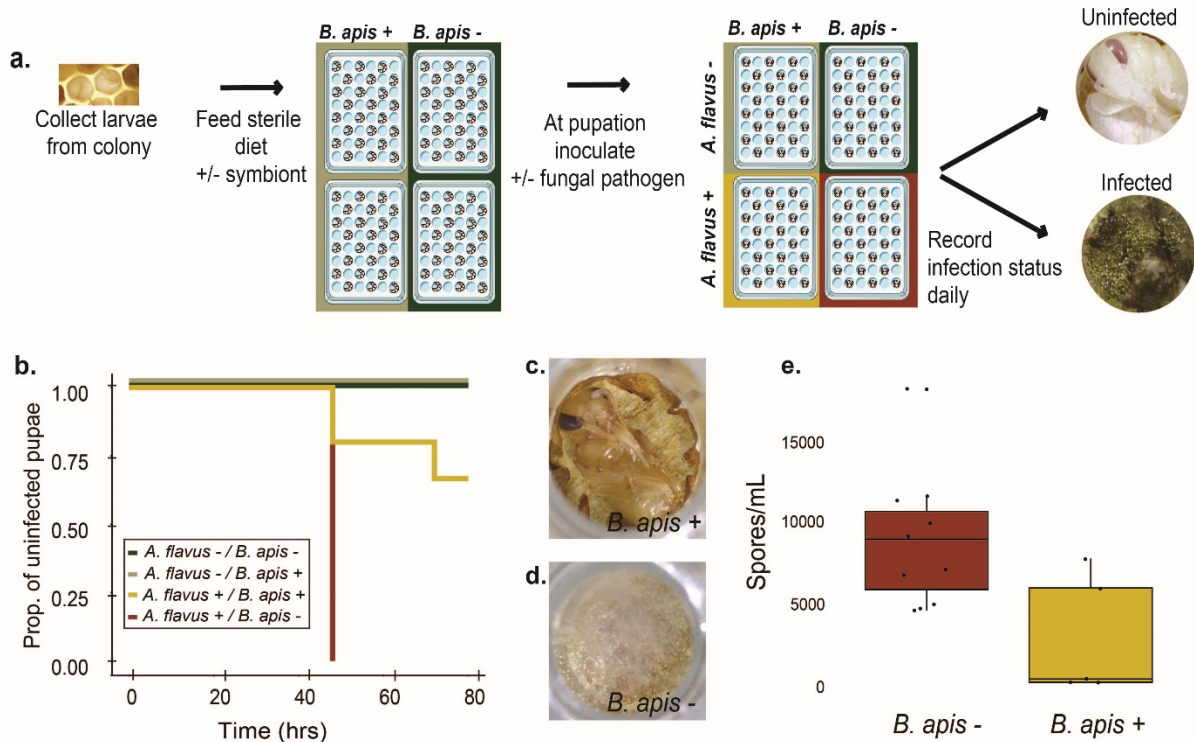

253

254 **Figure 2: Bee brood supplemented with *B. apis* are less susceptible to infection with**  
 255 ***A. flavus*.** **a,** First instar larvae (n = 45) collected from the apiary were reared on sterile larval  
 256 diet +/- *B. apis* (AJP2). Five days after pupation, each pupa was inoculated with 10<sup>3</sup> spores of  
 257 *A. flavus* +/- *B. apis* or 0.01% Triton X-100 as a control. **b,** Of the pupae inoculated with  
 258 *A. flavus*, those without *B. apis* all showed signs of infection by 48 hrs **d,** whereas 66% of those  
 259 with *B. apis* never developed infections ( $\chi^2 = 14.8$ , df = 1, p < 0.001) **c, e,** Pupae with *B. apis*  
 260 that did become infected had lower intensity infections, producing significantly (t = 5.5052, df =  
 261 5.5751, p = 0.002) fewer spores than those without *B. apis*.

262

263

264

265

266

267

268

269

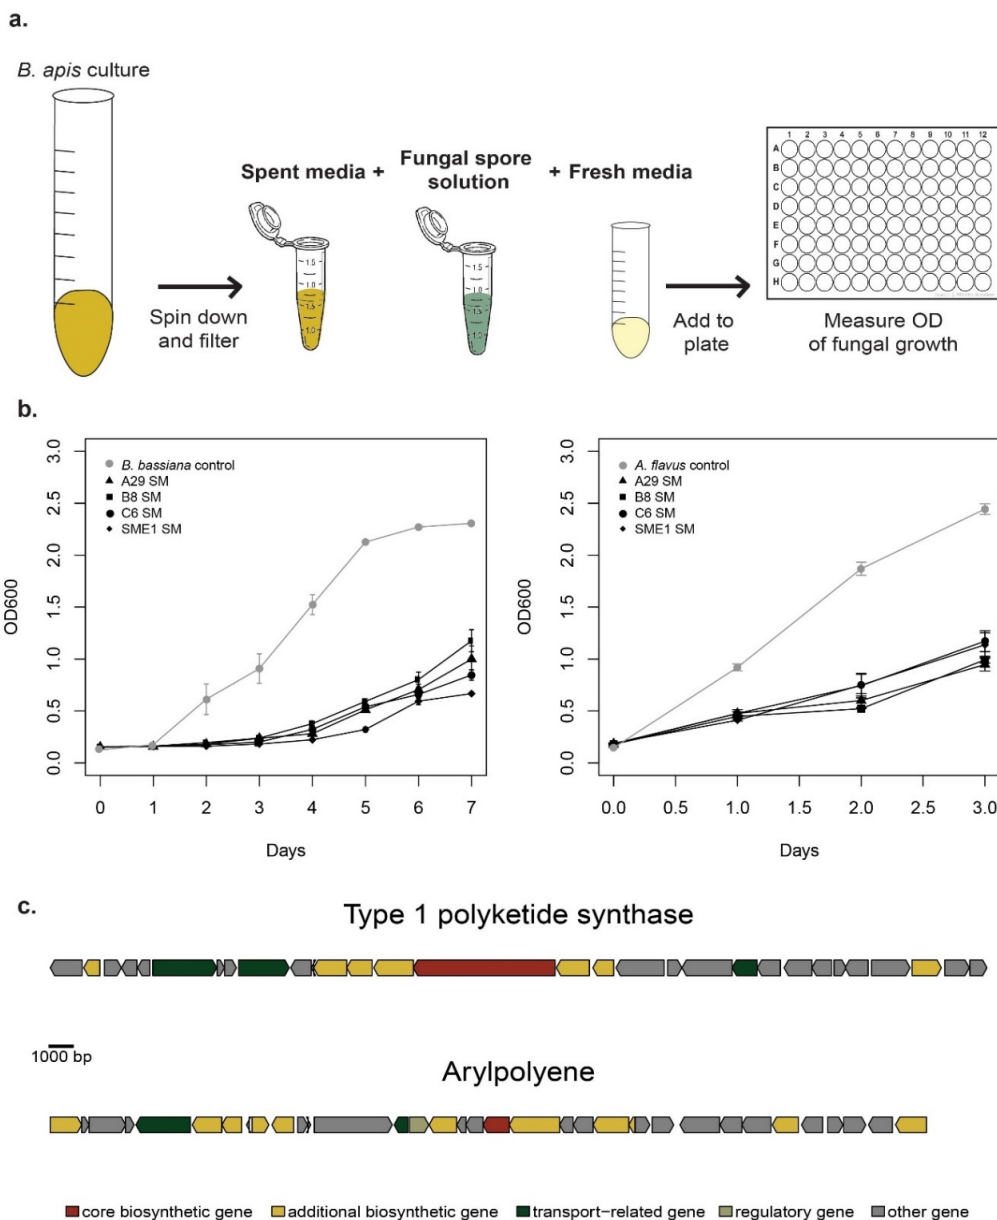

270

271 **Figure 3: Fungal inhibition is mediated by *B. apis* secreted metabolites.** **a**, Spores of fungal  
 272 isolates were incubated in spent media (SM) from *B. apis* cultures. **b**, The growth of both  
 273 *B. bassiana* (A29:  $t = -15.315$ ,  $df = 119$ ,  $p < 0.001$ ; B8:  $t = -13.925$ ,  $df = 119$ ,  $p < 0.001$ ; C6:  $t =$   
 274  $-13.202$ ,  $df = 119$ ,  $p < 0.001$ ; SME1:  $t = -11.963$ ,  $df = 119$ ,  $p < 0.001$ ) and *A. flavus* (A29:  $t = -11$   
 275  $.398$ ,  $df = 59$ ,  $p < 0.001$ ; B8:  $t = -13.022$ ,  $df = 59$ ,  $p < 0.001$ ; C6:  $t = -13.282$ ,  $df = 59$ ,  $p < 0.001$ ;  
 276 SME1:  $t = -11.261$ ,  $df = 59$ ,  $p < 0.001$ ) in SM was strongly reduced compared to the control,  
 277 suggesting secreted metabolites from *B. apis* mediate fungal inhibition. **c**, Genomic architecture  
 278 of the type 1 polyketide synthase and arylpolyene secondary metabolite gene clusters identified  
 279 by antiSMASH; gene models are colored based on putative function within the cluster and are  
 280 oriented to show direction of transcription

281

282

## 283 Methods

### 284 Isolates and culturing

285 All bacterial strains of *B. apis* and were obtained by sampling either nectar or larvae (Table  
286 1). Isolates were acquired from our apiary or from Leibniz-Institut DSMZ. All cultures were  
287 incubated for 48 hours at 30° C in MRS. Fungal isolates, *B. bassiana* and *A. flavus*, were  
288 maintained at 25°C with 80% RH or 34° C with ambient humidity respectively on PDA or  
289 MRS agar plates. Spore solutions were prepared by flooding fungal plates with 0.01% Triton  
290 X-100, agitating with a cell scraper, and suspending the spores in the solution.

291 Table 1: Sampling of *B. apis* strains

| species        | strain | origin | sample | Genome GenBank accession number |
|----------------|--------|--------|--------|---------------------------------|
| <i>B. apis</i> | AJP2   | NC     | nectar | N/A                             |
| <i>B. apis</i> | SME1   | IN     | nectar | GCA_009362775.1                 |
| <i>B. apis</i> | A29    | AZ     | larvae | GCA_002917995.1                 |
| <i>B. apis</i> | B8     | AZ     | larvae | GCA_002917945.1                 |
| <i>B. apis</i> | C6     | AZ     | larvae | GCA_002917985.1                 |

292

### 293 Competition plates

294 *B. apis* strains were grown to their maximal OD, and all strains were normalized to the  
295 lowest OD value by diluting in fresh media. A lawn of *B. apis* was created by plating 100 µL  
296 of normalized culture on MRS agar plates. The plate was then inoculated with 10<sup>3</sup> spores of  
297 each fungal isolate and incubated at the appropriate temperature for that isolate. Over the



298 course of three to seven days (depending on isolate) the presence of hyphal/conidia growth  
299 was monitored.

### 300 **Competition assays**

301 *B. apis* strains were grown to their maximal OD, and all strains were normalized to the  
302 lowest OD value by diluting in fresh media.  $10^3$  spores of each fungal isolate were incubated  
303 in 100  $\mu$ l of density-normalized *B. apis* culture or 100  $\mu$ l of fresh media. Fungal growth was  
304 monitored daily and once controls showed sporulation, spore counts were quantified for each  
305 well via hemocytometer.

### 306 **Larval collection and *in vivo* infections**

307 Late first instars were grafted from our apiary at Indiana University Research and Teaching  
308 Preserve into queen cups filled with UV-sterilized worker diet prepared as outlined in  
309 Schmel et. al, 2016<sup>37</sup>. *B. apis* supplemented groups were given diet with a ratio of 1:4  
310 stationary (OD=1.0) *B. apis* in MRS to worker diet. This bacterial load was between 2 x  
311  $10^6$  and 6 x  $10^6$  cells/mL. Control groups were given diet with a ratio of 1:4 axenic MRS  
312 media to worker diet. After 5 days in larval diet, pre-pupae were transferred to new wells  
313 after either MRS or *B. apis* in MRS was added. Five days into pupal development,  
314 individuals were inoculated with  $10^3$  spores of *A. flavus* in 0.01% Triton X-100 or an equal  
315 volume of 0.01% Triton X-100 as a control. *B. apis*-supplemented groups were co-  
316 inoculated with one final dose of the bacterium ( $10^4$  cells); controls received the same  
317 volume of MRS. Presence of infections (as evidenced by hyphae penetrating through the  
318 cuticle and/or spore production) was scored daily until adulthood.

### 319 **Analysis of biosynthetic gene clusters (BGCs)**



320 Genomes for all strains were downloaded from GenBank (see Table 1 for accession  
321 numbers) and re-annotated with RAST<sup>3536</sup>. The resulting GFF files and corresponding  
322 genome files were uploaded to antiSMASH<sup>26</sup> and results were compared across strains to  
323 determine conserved secondary metabolite synthesis clusters. Gene model figures were  
324 visualized and adapted for publication using R<sup>38</sup>.

### 325 **In vitro antifungal assay**

326 To obtain spent media, strains were grown to their maximal OD (0.6-0.25), and all strains  
327 were normalized to the lowest OD value by diluting in fresh media. Cultures were spun down  
328 at 9,000 rpm for 5 min and the supernatant filtered through a 0.2 µm filter to remove  
329 bacterial cells. Spent media and fresh media were added to a multi-well plate in equal  
330 volumes and 10<sup>3</sup> spores from spore stock solutions were added. Growth was measured daily  
331 by assaying OD<sub>600</sub>. A positive control included spores in fresh media alone used to compare  
332 to treatment groups with spent media. Optical densities of spent media alone were monitored  
333 to ensure no bacterial growth occurred. Assay plates were incubated at the appropriate  
334 temperature for the fungal isolate used. Since *B. apis* acidifies the media from a pH of 5.5 to  
335 5.0, controls of MRS media reduced to pH 5.0 with HCl were included.

### 336 **Statistical analyses**

337 All statistical analyses were performed in R<sup>38</sup>. Spore counts of fungal isolates in the presence  
338 of *B. apis* were compared to controls with unequal variance, two sample t tests; p-values  
339 were Bonferroni-corrected for multiple comparisons across strains. *In vivo* infections are  
340 displayed as Kaplan-Meier survival curves. *B. apis* +/- infected treatments were compared  
341 with a long-rank test using R package, “survminer”<sup>39</sup>. Interactive effects of *B. apis* SM on

342 growth of fungi over time were determined with a generalized linear model of OD, time, and  
343 strain identity.

344 **Data and code availability:** All genomic data used in this manuscript are publicly available  
345 through NCBI and listed in Table 1.

#### 346 **Methods References**

- 347 37. Schmehl, D. R., Tomé, H. V. V, Mortensen, A. N., Martins, G. F. & Ellis, J. D. Protocol  
348 for the *in vitro* rearing of honey bee (*Apis mellifera* L.) workers. *J. Apic. Res.* **55**, 113–  
349 129 (2016).
- 350 38. R Core Team. R: A Language and Environment for Statistical Computing. (2018).
- 351 39. Biecek, A. K. and M. K. and P. survminer: Drawing Survival Curves using ‘ggplot2’. R  
352 package version 0.4.6 (2019).
- 353 40. Pruesse, E., Peplies, J. & Glöckner, F. O. SINA: Accurate high-throughput multiple  
354 sequence alignment of ribosomal RNA genes. *Bioinformatics* **28**, 1823–1829 (2012).
- 355 41. Stamatakis, A. RAxML version 8: a tool for phylogenetic analysis and post-analysis of  
356 large phylogenies. *Bioinformatics* **30**, 1312–1313 (2014).
- 357 42. FigTree. Available at: <http://tree.bio.ed.ac.uk/software/figtree/>. (Accessed: 6th December  
358 2019)
- 359 43. Li, L., Stoeckert, C. J. & Roos, D. S. OrthoMCL: Identification of ortholog groups for  
360 eukaryotic genomes. *Genome Res.* **13**, 2178–2189 (2003).
- 361 44. Katoh, K. MAFFT: a novel method for rapid multiple sequence alignment based on fast  
362 Fourier transform. *Nucleic Acids Res.* **30**, 3059–3066 (2002).

363 **Acknowledgements:** This work was funded by a *Project Apis m.* grant to ILGN and a USDA  
364 NIFA to EAS.

365 **Author contributions:** Conception and design of the work, ILGN and DLM, acquisition,  
366 analysis, or interpretation of data, EAS and DLM, drafted and revised the manuscript, DLM,  
367 EAS, ILGN.

368 **Competing interests:**  
369 ILGN and DLM are co-founders of VitaliBee, a company based partly on the discovery  
370 described herein.

371 **Additional information**

372 Supplementary information is available for this paper at:

373 Correspondence and requests for materials should be addressed ILGN.

374

375

376

377

378

379

380

381

382

383

384

385

386

387

388

389

390

391

392

393

394

395 **Supplemental Data**

396

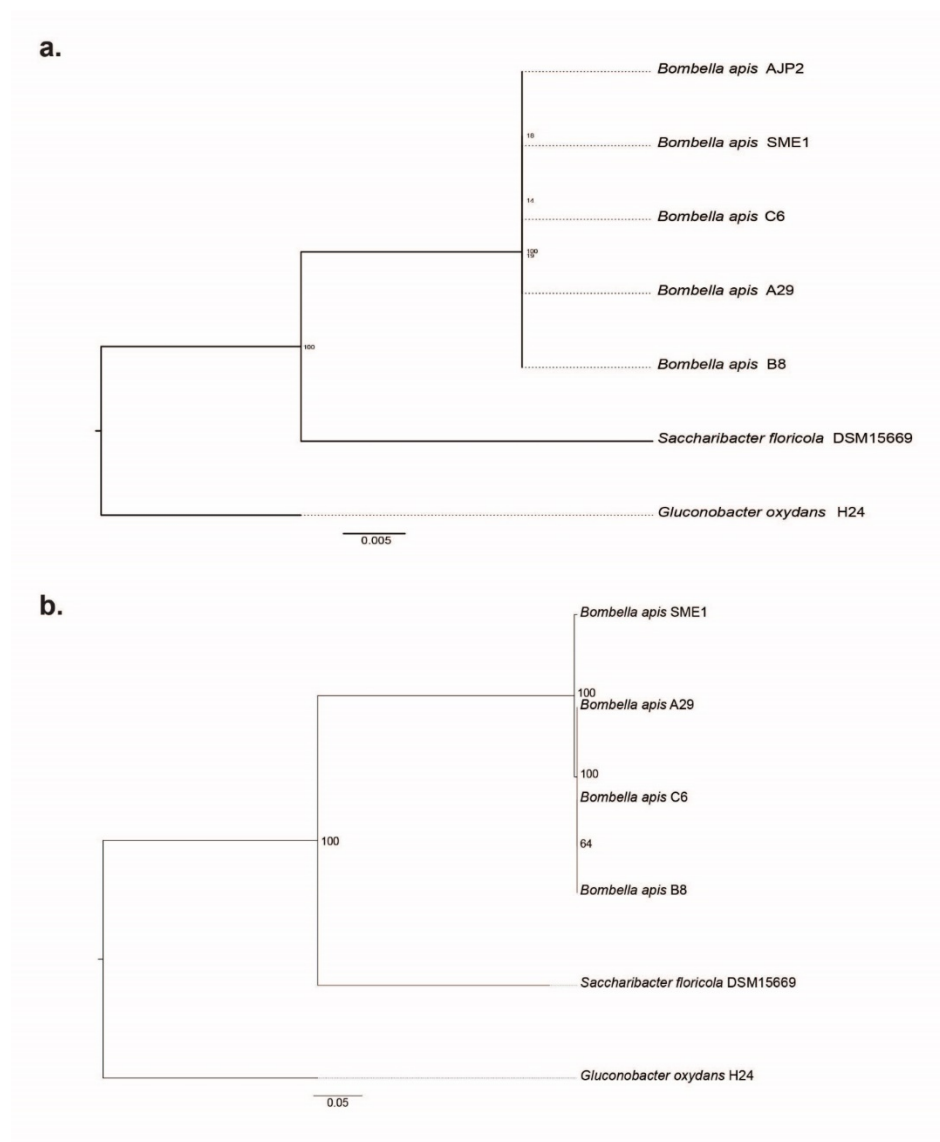

397

398 **Supplementary Figure 1:** A. Maximum-likelihood 16S rRNA gene sequence tree for strains  
399 used in this study. *Saccharibacter floricola* and *Gluconobacter oxydans* were used as outgroups.  
400 Sequences were downloaded from GenBank and aligned with the SINA aligner<sup>40</sup>. The tree was  
401 constructed with RAxML<sup>41</sup> and visualized with FigTree<sup>42</sup>. Numbers at nodes represent bootstrap  
402 support from 1000 bootstrap pseudoreplicates. B. Core-ortholog maximum-likelihood  
403 phylogeny. All genomes were downloaded from GenBank and core orthologs were identified  
404 using OrthoMCL<sup>43</sup>. Alignments of core orthologs were made using MAFFT<sup>44</sup> and concatenated  
405 together. As above, the tree was constructed with RAxML<sup>41</sup> and visualized with FigTree<sup>42</sup>.  
406 Numbers at nodes represent bootstrap support from 1000 bootstrap pseudoreplicates.

407

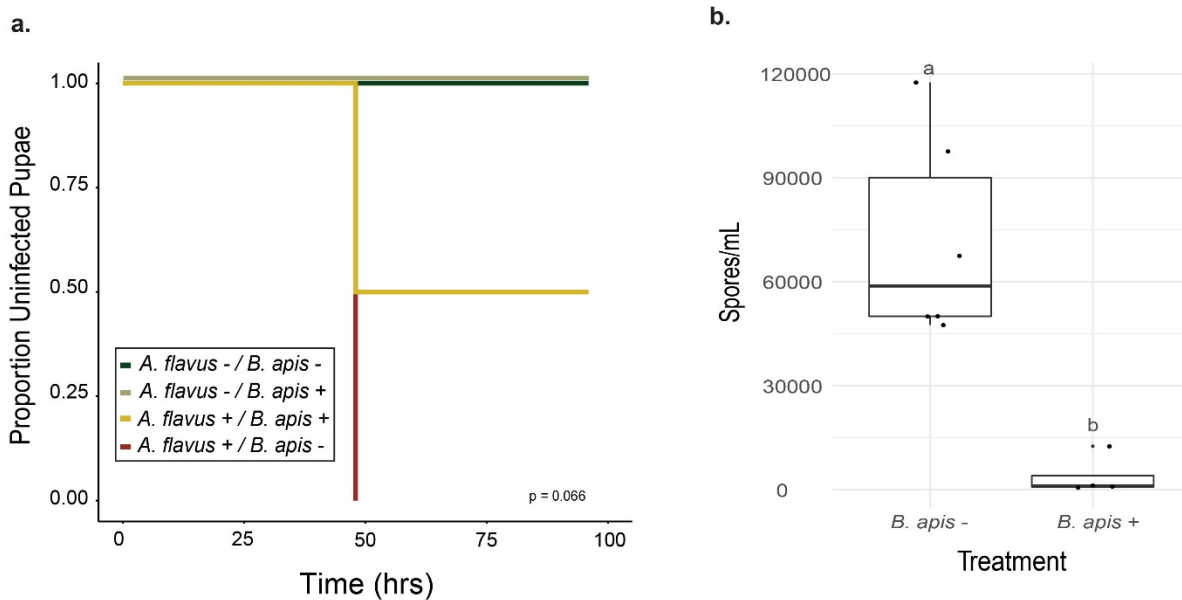

408

409 **Supplementary Figure 2: Bee brood are protected from fungal infection, independent of**  
410 ***B. apis* strain identity.** **a,** First instar larvae ( $n = 20$ ) collected from the apiary were reared on  
411 sterile larval diet +/- *B. apis* (A29). Five days after pupation, each pupa was inoculated with  $10^3$   
412 spores of *A. flavus* +/- *B. apis* or 0.01% Triton X-100 as a control. Pupae supplemented with A29  
413 were more likely to survive to adulthood ( $\chi^2 = 3.4$ ,  $df = 1$ ,  $p = 0.07$ ) **b,** Presence of *B. apis*  
414 (A29) significantly reduced ( $t = 5.5052$ ,  $df = 5.5751$ ,  $p = 0.001914$ ) sporulation in infected pupae  
415 .

416

417

418

419

420

421

422

423

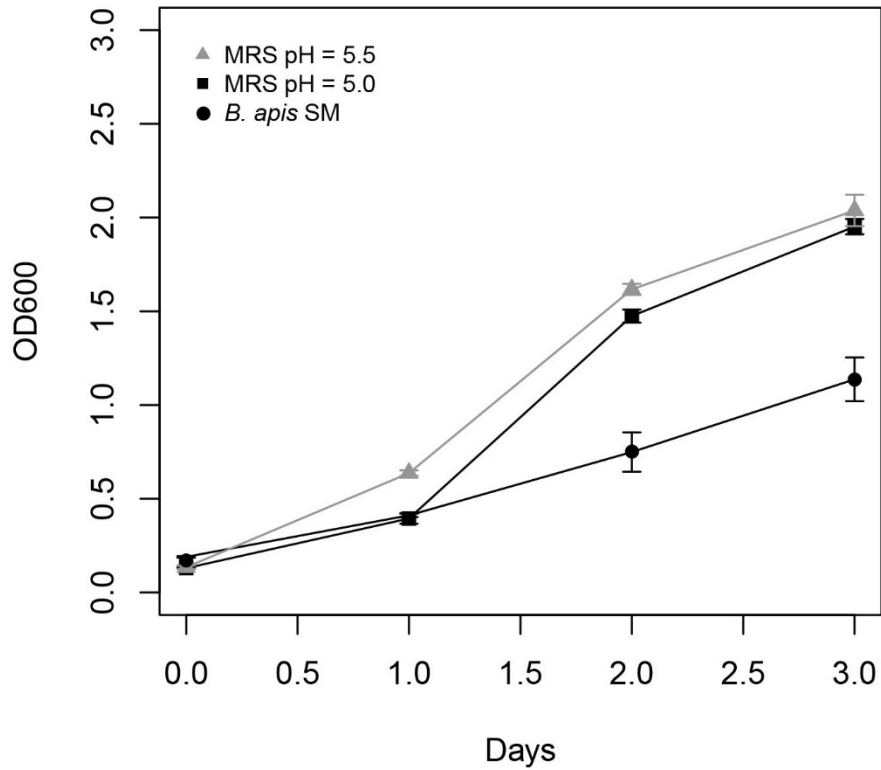

424

425 **Supplemental Figure 3: Fungal inhibition by SM is not pH-mediated.** *B. apis* (A29) reduces  
426 MRS media from a pH of 5.5 to 5.0. Spent media from *B. apis* at pH 5.0 significantly reduced  
427 fungal growth ( $t = -6.111$ ,  $df = 35$ ,  $p < 0.001$ ) while MRS media reduced to a pH of 5.0 using HCl  
428 did not significantly reduce growth ( $t = -0.251$ ,  $df = 35$ ,  $p = 0.804$ ).
